# Supplementary material for: Chile’s 2014 sugar-sweetened beverage tax and changes in prices and purchases of sugar-sweetened beverages: An observational study in an urban environment
Source: PubMed Central journal article supplement (PMC6029755; doi:10.1371/journal.pmed.1002597), 2018-07-03
Supplement: pmed.1002597.s002.pdf [file pmed.1002597.s002.pdf]

**S2 Table. Beverage categorization system**

| <b>Category</b>       | <b>Tax rate</b> | <b>Examples of beverage types</b>                                                                                    |
|-----------------------|-----------------|----------------------------------------------------------------------------------------------------------------------|
| Untaxed               | 0%              | plain bottled water, milk and dairy drinks, milk powders and modifiers, 100% fruit/vegetable juices, coffee, and tea |
| Ready-to-drink L-SSBs | 10%             | sodas, fruit juices, and flavored waters with less than 6.25gr/100ml                                                 |
| L-SSB concentrates    | 10%             | powders and concentrates with less than 6.25gr/100ml                                                                 |
| Noncarbonated H-SSBs  | 18%             | fruit juices, nectars, and flavored waters with more than 6.25gr/100ml                                               |
| Carbonated H-SSBs     | 18%             | sodas with more than 6.25gr/100ml                                                                                    |
