# Supplementary material for: Chile’s 2014 sugar-sweetened beverage tax and changes in prices and purchases of sugar-sweetened beverages: An observational study in an urban environment
Source: PubMed Central journal article supplement (PMC6029755; doi:10.1371/journal.pmed.1002597), 2018-07-03
Supplement: pmed.1002597.s003.pdf [file pmed.1002597.s003.pdf]

**S3 Table. Household-level descriptive statistics (household-month averages)**

|                                                  | <b>High SES</b><br><b>N = 24,756</b> | <b>Low SES</b><br><b>N = 39,864</b> | <b>Overall</b><br><b>N = 64,620</b> | <b>Attrition=1</b><br><b>N = 39,864</b> |
|--------------------------------------------------|--------------------------------------|-------------------------------------|-------------------------------------|-----------------------------------------|
| <b>Household region (%)</b>                      |                                      |                                     |                                     |                                         |
| Santiago (region XIII)                           | 60%                                  | 43%                                 | 47%                                 | 46%                                     |
| North (regions I to IV)                          | 8%                                   | 13%                                 | 12%                                 | 14%                                     |
| Valparaiso (region V)                            | 7%                                   | 9%                                  | 9%                                  | 9%                                      |
| South-central (regions VI and VII)               | 7%                                   | 11%                                 | 10%                                 | 14%                                     |
| Bio-Bio (region VIII)                            | 6%                                   | 9%                                  | 9%                                  | 6%                                      |
| South (regions X to XII)                         | 11%                                  | 13%                                 | 13%                                 | 11%                                     |
| <b>Household demographics and working status</b> |                                      |                                     |                                     |                                         |
| Household head working (%)                       | 68%                                  | 80%                                 | 77%                                 | 74%                                     |
| Household size                                   | 3.9 (1.7)                            | 4.3 (1.9)                           | 4.2 (1.8)                           | 4.0 (1.7)                               |
| Children less than 5 years old                   | 0.2 (0.5)                            | 0.4 (0.6)                           | 0.3 (0.4)                           | 0.4 (0.5)                               |
| Children between 5 and 11 years old              | 0.4 (0.8)                            | 0.6 (0.8)                           | 0.5 (0.7)                           | 0.5 (0.7)                               |
| Children between 12 and 18 years old             | 0.4 (0.7)                            | 0.5 (0.8)                           | 0.5 (0.8)                           | 0.5 (0.7)                               |
| Adults per household                             | 2.8 (1.1)                            | 2.7 (1.0)                           | 2.8 (1.0)                           | 2.7 (1.1)                               |
| Age of household head                            | 53.1 (14.8)                          | 47.7 (14.5)                         | 49.1 (15.0)                         | 51.6 (15.0)                             |
| <b>Household head education (%)</b>              |                                      |                                     |                                     |                                         |
| No formal education                              | 3%                                   | 18%                                 | 15%                                 | 12%                                     |
| Middle school                                    | 16%                                  | 38%                                 | 33%                                 | 31%                                     |
| High school                                      | 31%                                  | 36%                                 | 35%                                 | 32%                                     |
| College or more                                  | 50%                                  | 8%                                  | 18%                                 | 25%                                     |

Note: Weighted values using sample weights provided by Kantar WorldPanel, representative of urban households in six major zones of the country (74% of total urban population. 95% confidence intervals in parenthesis. Attrition=1 indicates households that left the survey at any point between 2013-2015.
