# Supplementary material for: Chile’s 2014 sugar-sweetened beverage tax and changes in prices and purchases of sugar-sweetened beverages: An observational study in an urban environment
Source: PubMed Central journal article supplement (PMC6029755; doi:10.1371/journal.pmed.1002597), 2018-07-03
Supplement: pmed.1002597.s004.pdf [file pmed.1002597.s004.pdf]

**S4 Table. Market-level price descriptive statistics (market-month averages)**

| Category              | Observations | Number of products | Average price (Chilean pesos) |                |                |
|-----------------------|--------------|--------------------|-------------------------------|----------------|----------------|
|                       |              |                    | Low SES                       | High SES       | Overall        |
| Untaxed               | 68,838       | 97                 | 773 (766, 780)                | 810 (803, 817) | 780 (773, 788) |
| <i>Taxed 10%</i>      |              |                    |                               |                |                |
| Ready-to-drink L-SSBs | 16,474       | 23                 | 670 (663, 673)                | 721 (715, 725) | 684 (677,687)  |
| L-SSB concentrates    | 5,363        | 9                  | 158 (157, 159)                | 172 (171, 173) | 159 (158, 160) |
| <i>Taxed 18%</i>      |              |                    |                               |                |                |
| Noncarbonated H-SSBs  | 8,271        | 10                 | 870 (865, 873)                | 896 (891, 899) | 884 (879, 886) |
| Carbonated H-SSBs     | 15,057       | 18                 | 736 (731, 739)                | 744 (739, 748) | 734 (729, 738) |

Note: Weighted values using sample weights provided by Kantar WorldPanel, representative of urban households in six major zones of the country (74% of total urban population). Average and 95% CIs (in parenthesis) calculated using the Cox method .
