# Supplementary material for: Chile’s 2014 sugar-sweetened beverage tax and changes in prices and purchases of sugar-sweetened beverages: An observational study in an urban environment
Source: PubMed Central journal article supplement (PMC6029755; doi:10.1371/journal.pmed.1002597), 2018-07-03
Supplement: pmed.1002597.s005.pdf [file pmed.1002597.s005.pdf]

S5 Table. Household level purchases descriptive statistics (household-month average)

| Category              | fraction with purchases | ml/capita/month      |                      |                      | kcal/capita/month       |                         |                         |
|-----------------------|-------------------------|----------------------|----------------------|----------------------|-------------------------|-------------------------|-------------------------|
|                       |                         | Low SES              | High SES             | Overall              | Low SES                 | High SES                | Overall                 |
| <i>Untaxed</i>        | 49%                     | 12900 (13037, 12764) | 16506 (16354, 16659) | 13835 (13693, 13979) | 1177.3 (1130.0, 1226.5) | 1893.1 (1837.9, 1950.0) | 1345.5 (1294.5, 1398.5) |
| <i>Taxed 10%</i>      |                         |                      |                      |                      |                         |                         |                         |
| Ready-to-drink L-SSBs | 46%                     | 1408 (1392, 1423)    | 2591 (2563, 2619)    | 1770 (1746, 1787)    | 66.0 (64.7, 67.4)       | 76.7 (75.0, 78.4)       | 56.3 (55.5, 57.0)       |
| L-SSB concentrates    | 52%                     | 3087 (3061, 3113)    | 3835 (3804, 3866)    | 3245 (3218, 3245)    | 11.1 (10.9, 11.3)       | 5.3 (5.1, 5.4)          | 9.6 (9.4, 9.8)          |
| <i>Taxed 18%</i>      |                         |                      |                      |                      |                         |                         |                         |
| Non-carbonated H-SSBs | 50%                     | 907 (898, 915)       | 1313 (1301, 1325)    | 1007 (998, 1017)     | 408.1 (404.2, 412.0)    | 593.0 (587.5, 598.3)    | 448.7 (444.5, 453.0)    |
| Carbonated H-SSBs     | 74%                     | 3645 (3610, 3680)    | 3344 (3313, 3375)    | 3586 (3621, 3552)    | 1504.8 (1491.5, 1518.1) | 1394.1 (1382.0, 1406.3) | 1472.9 (1459.9, 1485.9) |

Note: Weighted values using sample weights provided by Kantar WorldPanel, representative of urban households in six major zones of the country (74% of total urban population). Average and 95% CIs (in parentheses) calculated using the Cox method, considering only households with purchases in each period as pooled sample. 64,620 household monthly observations.
