# Supplementary material for: Chile’s 2014 sugar-sweetened beverage tax and changes in prices and purchases of sugar-sweetened beverages: An observational study in an urban environment
Source: PubMed Central journal article supplement (PMC6029755; doi:10.1371/journal.pmed.1002597), 2018-07-03
Supplement: pmed.1002597.s006.pdf [file pmed.1002597.s006.pdf]

**S6 Table. Shapiro-Wilk normality test of log prices for selected products**

| <b>Category</b>  | <b>obs</b> | <b>W-stat</b> | <b>z-score</b> | <b>p-value</b> |
|------------------|------------|---------------|----------------|----------------|
| <i>Untaxed</i>   |            |               |                |                |
| Product ID 5271  | 643        | 0.94          | -1.15          | 0.88           |
| <i>Taxed 10%</i> |            |               |                |                |
| Product ID 5221  | 683        | 0.90          | -1.15          | 0.87           |
| Product ID 4881  | 856        | 0.86          | -0.97          | 0.83           |
| <i>Taxed 18%</i> |            |               |                |                |
| Product ID 5312  | 863        | 0.88          | -1.11          | 0.87           |
| Product ID 5172  | 821        | 0.96          | -1.12          | 0.87           |

Note: Product IDs were coded and selected randomly. Shapiro-Wilk test has a null hypothesis of normality. W-stat indicates the Shapiro-Wilk statistic.
