# Supplementary material for: Chile’s 2014 sugar-sweetened beverage tax and changes in prices and purchases of sugar-sweetened beverages: An observational study in an urban environment
Source: PubMed Central journal article supplement (PMC6029755; doi:10.1371/journal.pmed.1002597), 2018-07-03
Supplement: pmed.1002597.s007.pdf [file pmed.1002597.s007.pdf]

S7 Table. Average adjusted real prices, actual versus counterfactual estimates by brand market share and package size (Chilean pesos)

| Category              | Absolute difference         |                        |                             |                         | % change                       |                          | Package size<br>(p-value) | % change                    |                           | Brand size<br>(p-value) |
|-----------------------|-----------------------------|------------------------|-----------------------------|-------------------------|--------------------------------|--------------------------|---------------------------|-----------------------------|---------------------------|-------------------------|
|                       | Small package               | Large package          | Low market share            | High market share       | Small package                  | Large package            |                           | Low market share            | High market share         |                         |
| <i>Untaxed</i>        | <b>46.3 (29.7, 62.9)</b>    | -4.6 (-9.9, 0.7)       | <b>14.9 (5.9, 24.0)</b>     | 9.4 (-0.4, 19.2)        | <b>6.4% (4.1%, 8.7%)</b>       | -0.6% (-1.3%, 0.1%)      | 0.000                     | <b>2.0% (0.8%, 3.2%)</b>    | 1.4% (-0.1%, 2.9%)        | 0.350                   |
| <i>Taxed 10%</i>      |                             |                        |                             |                         |                                |                          |                           |                             |                           |                         |
| Ready-to-drink L-SSBs | <b>37.0 (14.3, 59.7)</b>    | 1.7 (-3.7, 7.2)        | <i>8.5 (-1.5, 18.4)</i>     | 16.5 (5.2, 27.8)        | <b>2.9% (1.1%, 4.7%)</b>       | 0.3% (-0.7%, 1.3%)       | 0.018                     | 1.1% (-0.2%, 2.4%)          | 2.7% (0.9%, 4.5%)         | 0.182                   |
| L-SSB concentrates    | <b>-69.1 (-73.5, -64.7)</b> | -3.7 (-7.6, 0.2)       | <b>-26.1 (-30.2, -21.9)</b> | <b>11.1 (7.2, 15.1)</b> | <b>-40.0% (-42.6%, -37.4%)</b> | -2.6% (-5.3%, 0.1%)      | 0.000                     | <b>-1.6% (-1.9%, -1.3%)</b> | <b>7.4% (4.8%, 10.1%)</b> | 0.000                   |
| <i>Taxed 18%</i>      |                             |                        |                             |                         |                                |                          |                           |                             |                           |                         |
| Noncarbonated H-SSBs  | <b>62.1 (33.0, 91.2)</b>    | 6.7 (-6.1, 19.6)       | <b>35.4 (15.3, 55.5)</b>    | 23.6 (3.3, 43.9)        | <b>5.5% (2.9%, 8.1%)</b>       | 1.1% (-1.0%, 3.2%)       | 0.005                     | <b>4.0% (1.7%, 6.3%)</b>    | 2.9% (0.4%, 5.4%)         | 0.431                   |
| Carbonated H-SSBs     | <b>29.9 (13.4, 46.4)</b>    | <b>9.9 (3.8, 16.0)</b> | <b>14.5 (7.8, 21.1)</b>     | <b>14.6 (5.3, 23.9)</b> | <b>2.2% (1.0%, 3.4%)</b>       | <b>1.9% (0.7%, 3.0%)</b> | 0.018                     | <b>1.9% (1.0%, 2.8%)</b>    | <b>2.0% (0.7%, 3.3%)</b>  | 0.986                   |

Note: Small packages coded as less than or equal to 2,500mL and large package otherwise. Small brands coded as less than or equal to 10% to total sales, and large brands otherwise. 95% CIs in parentheses. Results significantly different from zero indicated in bold, using the Sidak-Dunn correction for multiple hypothesis testing (critical value alpha = 0.0102). Unweighted estimates. Package size and brand size (p-value) indicates the difference in means test between the two groups for the predicted absolute differences. Observations in each model as indicated in Table 4.
